# Supplementary material for: Contributions of the Four Essential Entry Glycoproteins to HSV-1 Tropism and the Selection of Entry Routes
Source: PubMed Central journal article supplement (PMC8092210; doi:10.1128/mbio.00143-21), 2021-03-02
Supplement: mBio.00143-21-sf001.pdf [file mBio.00143-21-sf001.pdf]

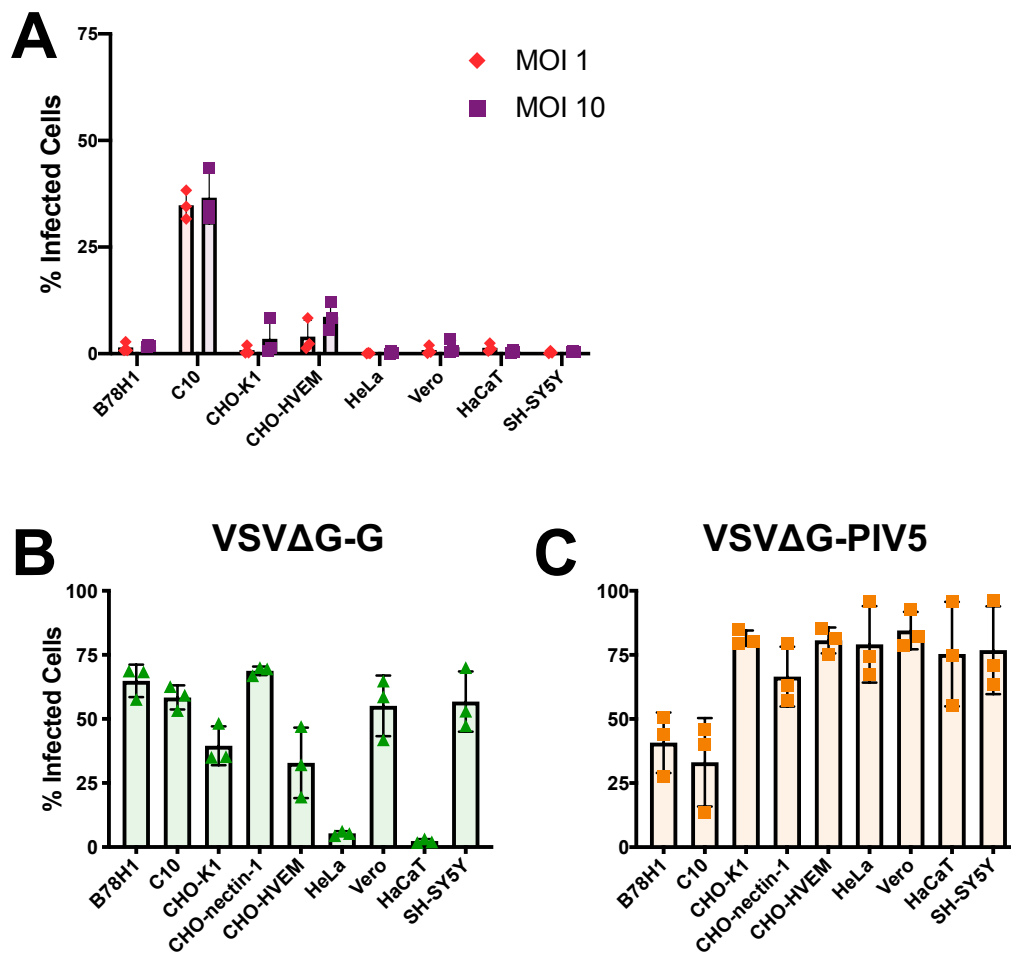

**Fig S1. Infecting cells with VSVΔG-BHLD at a higher MOI does not increase entry to an appreciable extent.** A) Receptor null (B78H1 and CHO-K1) and receptor bearing cells (C10, CHO-HVEM, HeLa, Vero, HaCaT, and SH-SY5Y) were infected at MOI = 1 (red) or MOI = 10 (purple). Entry efficiency was assessed by flow cytometry at 6 hours post infection. B and C) Receptor null (B78H1 and CHO-K1) and receptor bearing cells (C10, CHO-HVEM, HeLa, Vero, HaCaT, and SH-SY5Y) were infected at MOI = 1 with either VSVΔG-G (B) or VSVΔG-PIV5 (C). Entry was assessed by flow cytometry at 6 hours post infection.
