# Supplementary material for: Contributions of the Four Essential Entry Glycoproteins to HSV-1 Tropism and the Selection of Entry Routes
Source: PubMed Central journal article supplement (PMC8092210; doi:10.1128/mbio.00143-21), 2021-03-02
Supplement: mBio.00143-21-sf002.pdf [file mBio.00143-21-sf002.pdf]

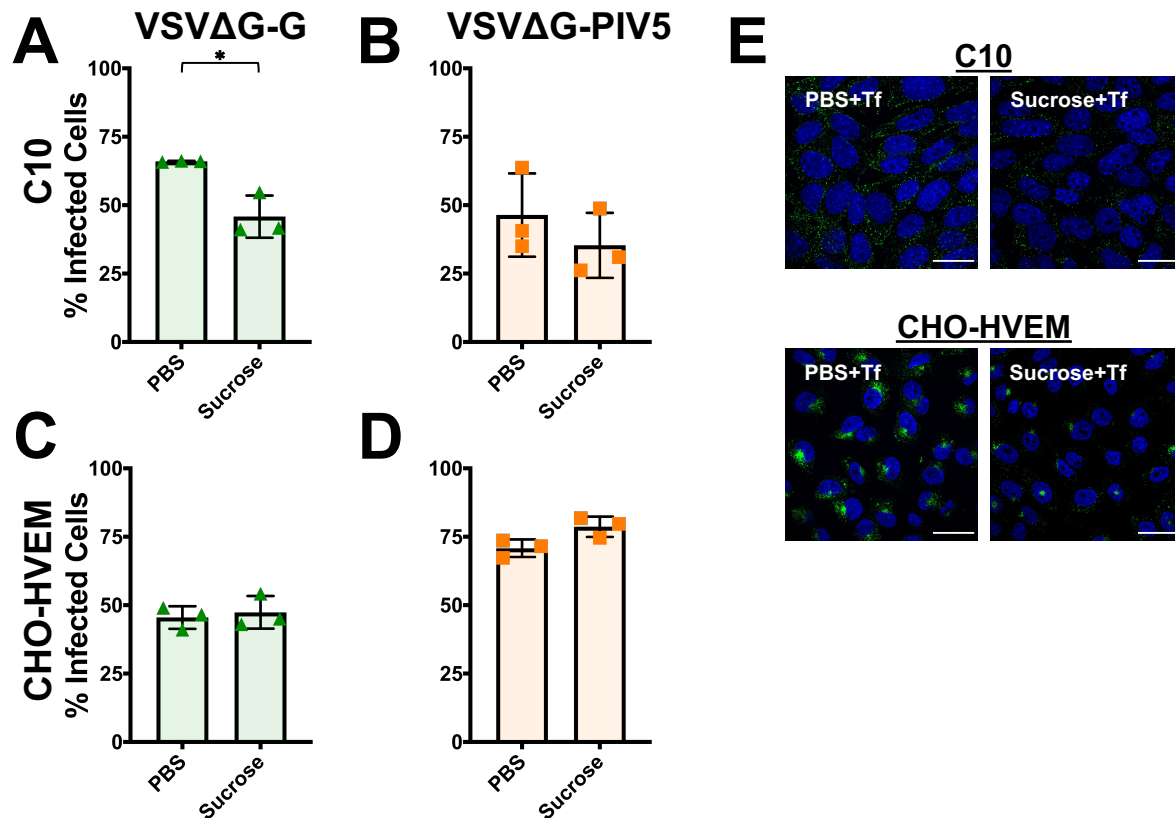

**Fig. S2. VSVΔG-G and VSVΔG-PIV5 entry in the presence of hypertonic sucrose.** C10 (A, B) and CHO-HVEM (C, D) cells were pretreated with a hypertonic solution of sucrose (0.3 M) and infected with VSVΔG-G or VSVΔG-PIV5 at MOI = 1. Infectivity was quantitated by flow cytometry at 6 hours post infection. Significance was calculated using a two-tailed Student's T-test with Welch's correction ( $p < 0.05 = *$ ;  $p < 0.01 = **$ ;  $p < 0.001 = ***$ ). E) C10 and CHO-HVEM cells were pretreated with 0.3 M sucrose and incubated with 50  $\mu\text{g/ml}$  of AF488-labeled transferrin (Tf). Cells were fixed, counterstained with DAPI, and imaged by confocal microscopy. Scale bar = 25  $\mu\text{m}$ .
