# Supplementary material for: Contributions of the Four Essential Entry Glycoproteins to HSV-1 Tropism and the Selection of Entry Routes
Source: PubMed Central journal article supplement (PMC8092210; doi:10.1128/mbio.00143-21), 2021-03-02
Supplement: mBio.00143-21-sf005.pdf [file mBio.00143-21-sf005.pdf]

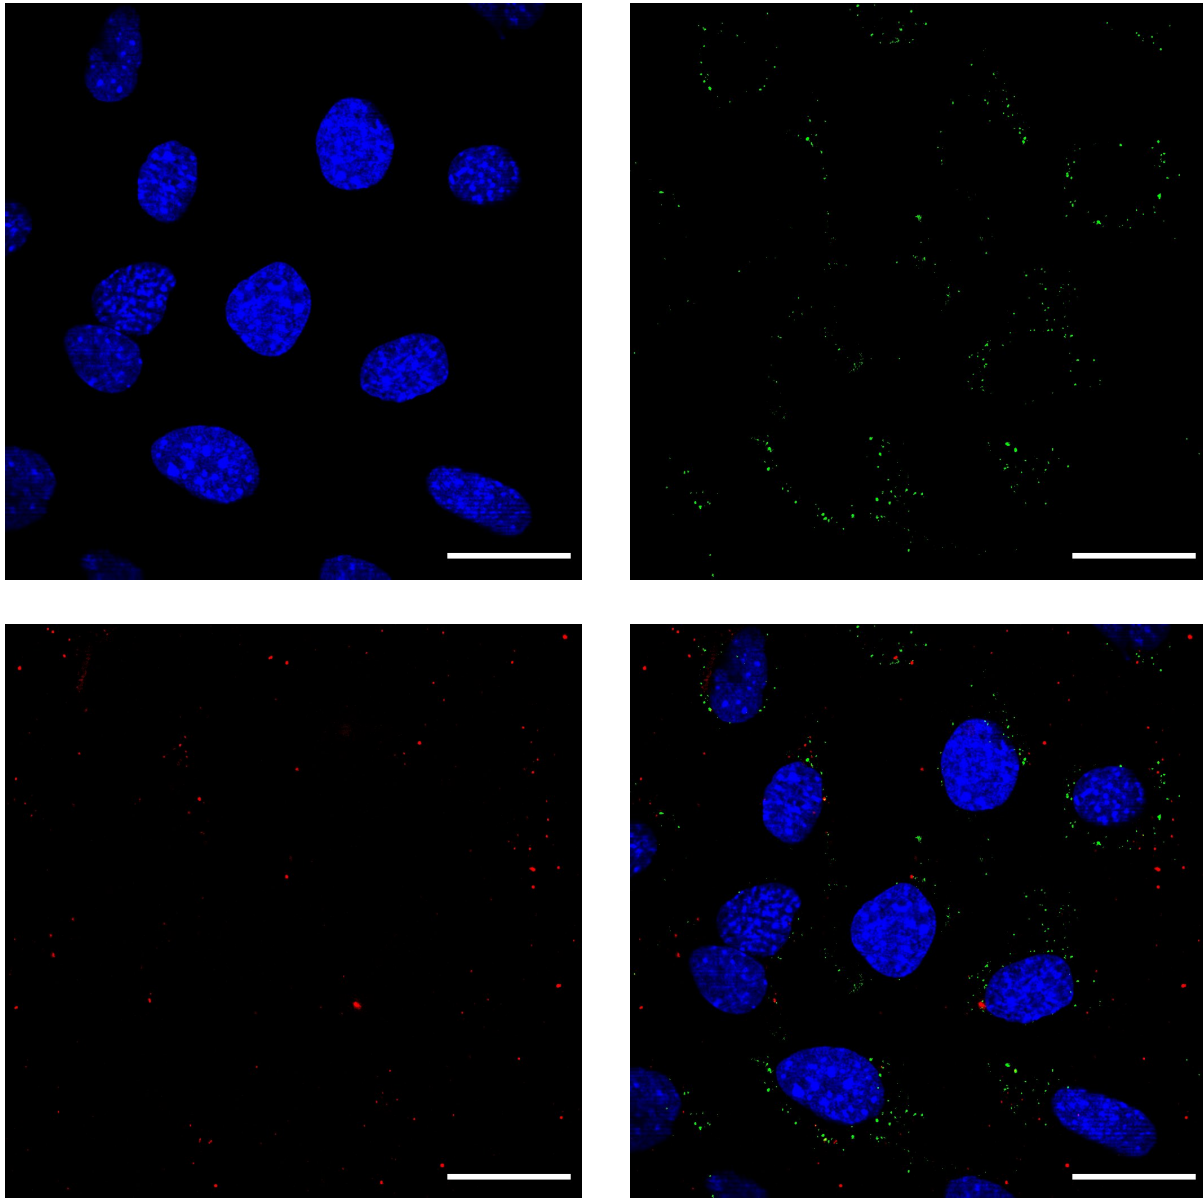

**Fig. S5. VSV $\Delta$ G-BHLD does not co-localize with the fluid-phase marker 70 kDa dextran in C10 cells.** C10 cells were incubated with 1 mg/ml of rhodamine-B labelled 70 kDa dextran and VSV $\Delta$ G-BHLD (MOI = 1) for one hour at 4°C. Cells were then shifted to 37 °C for 20 minutes. Cells were fixed, counterstained with DAPI, and imaged by confocal microscopy. gB was detected by immunofluorescence using the rabbit pAb R68 and anti-rabbit IgG conjugated to FITC. Green = gB (marker for VSV $\Delta$ G-BHLD particles); Red = 70 kDa dextran. Scale bar = 25  $\mu$ m.
