# Supplementary material for: Contributions of the Four Essential Entry Glycoproteins to HSV-1 Tropism and the Selection of Entry Routes
Source: PubMed Central journal article supplement (PMC8092210; doi:10.1128/mbio.00143-21), 2021-03-02
Supplement: mBio.00143-21-st001.pdf [file mBio.00143-21-st001.pdf]

| Target           | Inhibitors         | HSV-1 |          | VSVΔG-BHLD |          | VSVΔG-G |          | VSVΔG-PIV5 |          |
|------------------|--------------------|-------|----------|------------|----------|---------|----------|------------|----------|
|                  |                    | C10   | CHO-HVEM | C10        | CHO-HVEM | C10     | CHO-HVEM | C10        | CHO-HVEM |
| Endocytosis      | Hypertonic sucrose | ✓     | ✓        | ✓          | ✓        | ✓       | ✗        | ✗          | ✗        |
| Dynamamin        | Dynasore           | ✓     | ✓        | ✓          | ✓        | ✓       | ✓        | ✗          | ✗        |
|                  | Dyngo-4a           | ✓     | ✓        | ✓          | ✓        | ✓       | ✓        | ✓          | ✗        |
|                  | MiTMAB             | ✓     | ✓        | ✓          | ✓        | ✓       | ✓        | ✗          | ✗        |
| Clathrin         | Pitstop-2          | ✓     | ✓        | ✗          | ✗        | ✓       | ✓        | ✗          | ✗        |
| Cholesterol      | MβCD               | ✓     | ✓        | ✓          | ✓        | ✗       | ✗        | ✓          | ✗        |
| Caveolin         | Cav-1 siRNA        | ✗     | ✗        | ✗          | ✗        | ✗       | ✗        | ✗          | ✗        |
| Macropinocytosis | CytoD              | ✗     | ✗        | ✗          | ✗        | ✓       | ✗        | ✗          | ✗        |
|                  | EIPA               | ✗     | ✓        | ✗          | ✗        | ✓       | ✓        | ✗          | ✗        |
|                  | NSC23766           | ✗     | ✗        | ✓          | ✓        | ✗       | ✗        | ✗          | ✗        |
| Small GTPases    | Rab5DN             | ✗     | ✗        | ✓          | ✗        | ✓       | ✓        | ✗          | ✗        |
|                  | Rab7DN             | ✗     | ✗        | ✗          | ✗        | ✗       | ✗        | ✗          | ✗        |
|                  | NAV-2729           | ✓     | ✓        | ✗          | ✗        | ✓       | ✓        | ✗          | ✗        |
| Low pH           | BFLA               | ✗     | ✗        | ✓          | ✗        | ✓       | ✓        | ✗          | ✗        |
|                  | NH <sub>4</sub> Cl | ✓     | ✓        | ✓          | ✓        | ✓       | ✓        | ✗          | ✗        |
|                  | Monensin           | ✓     | ✓        | ✓          | ✗        | ✓       | ✓        | ✗          | ✗        |

**Table S1. Sensitivity of HSV-1, VSVΔG-BHLD, VSVΔG-G, and VSVΔG-PIV5 to specific inhibitors.** Green check marks indicate that virus entry is sensitive to that particular inhibitor. Red X marks indicate that the virus is not sensitive to that particular inhibitor.
